# Supplementary material
Source: PubMed Central journal article supplement (PMC6526082)
Supplement: NIHMS1517614-supplement-1.pdf [file NIHMS1517614-supplement-1.pdf]

Figure S1. Combined nodal and distant failure according to centrality.

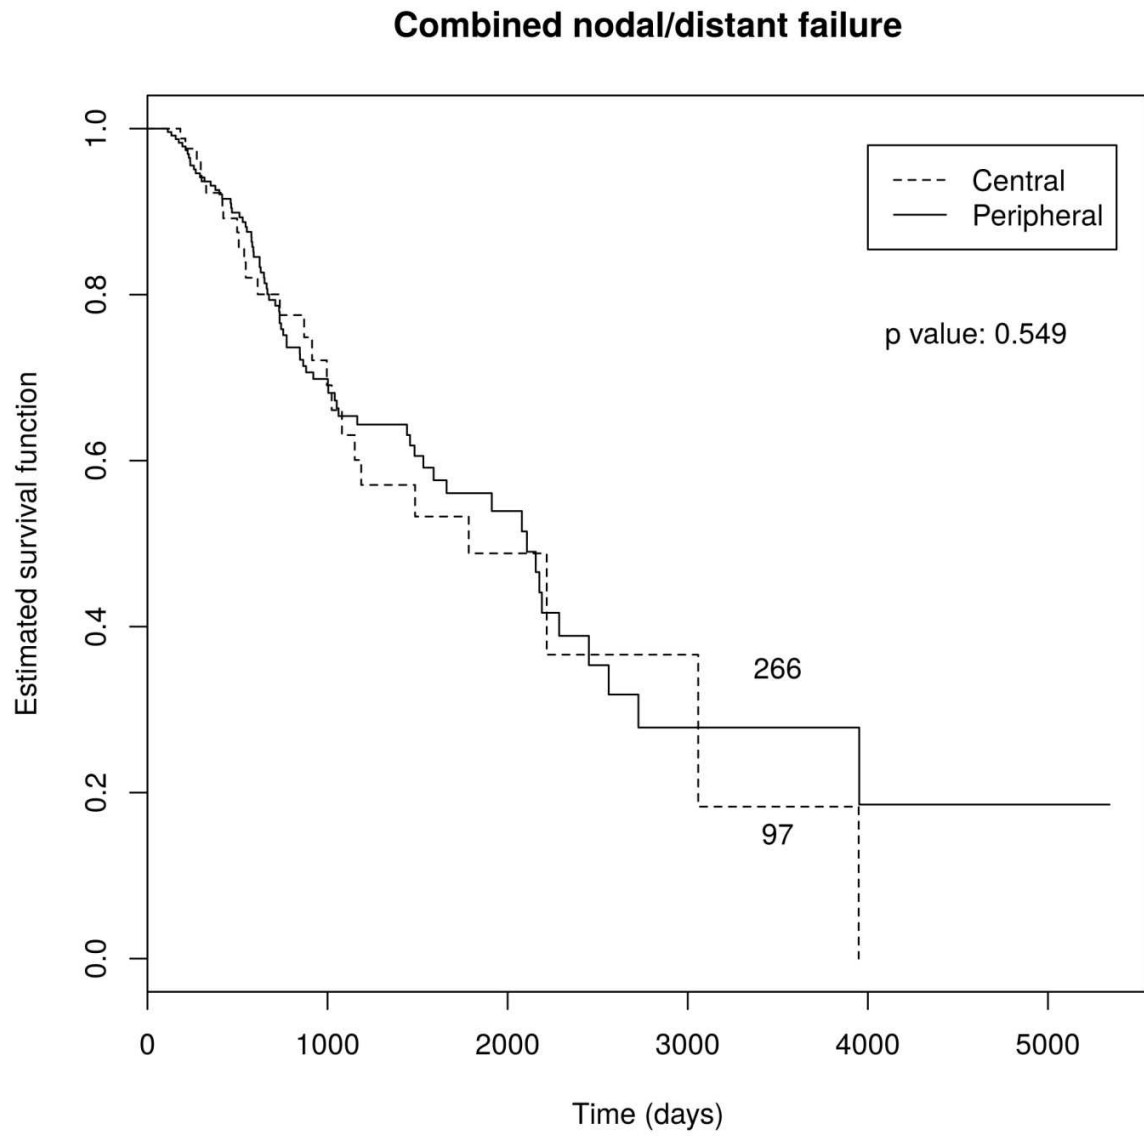

Figure S2. Risk of distant failure stratified by low-, medium-, and high risk in patients without a prior history of non-small cell lung cancer.

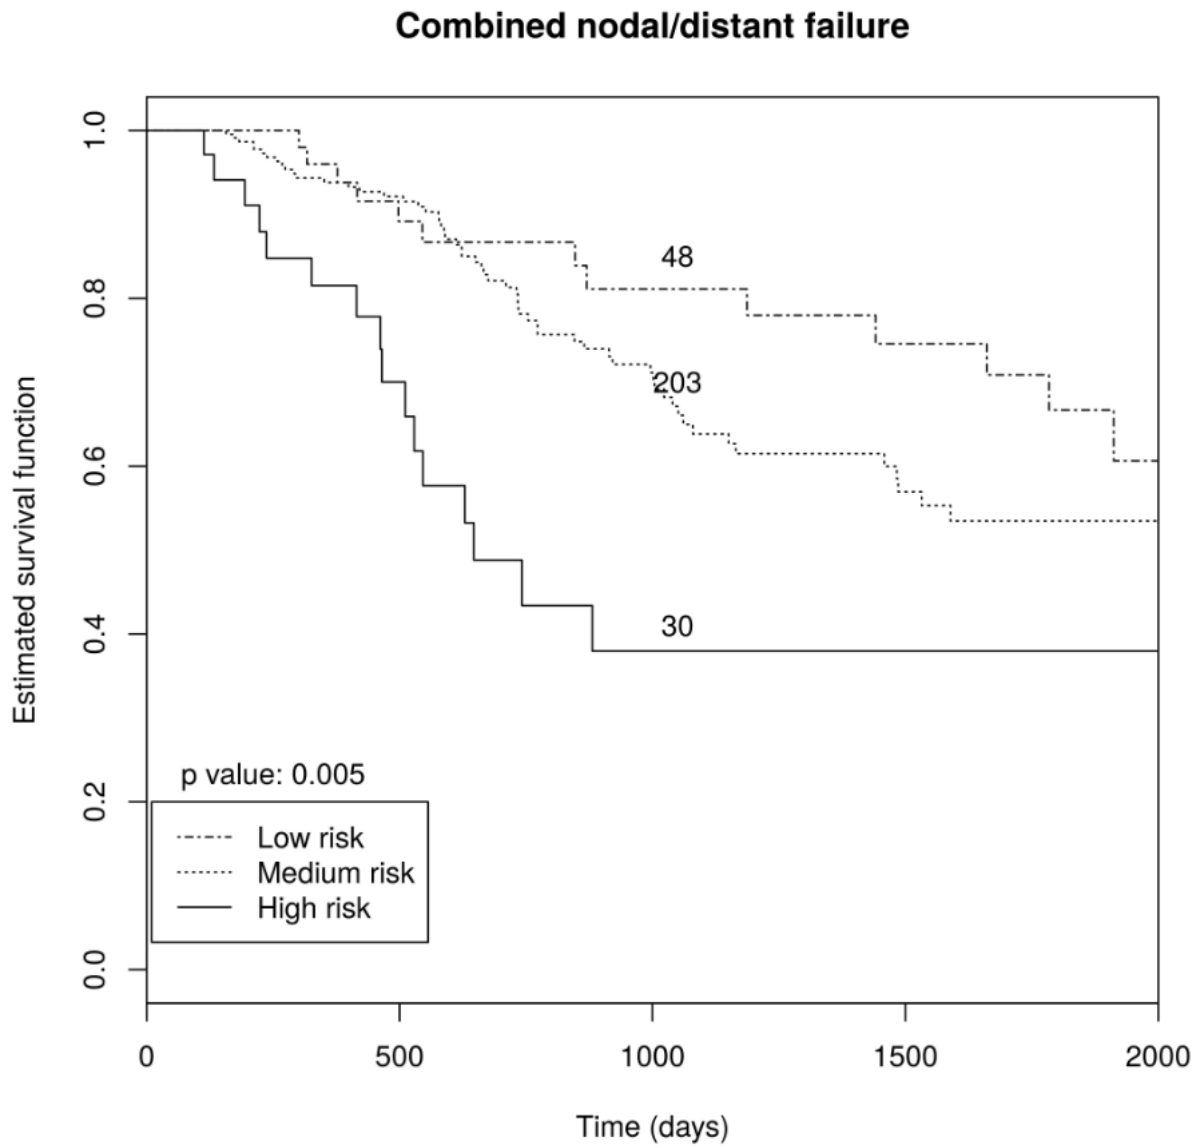

Table S1 Additional Multivariate Analysis for metastatic failure

|   |                  |        |                     |         |
|---|------------------|--------|---------------------|---------|
| 2 | GTV minimum dose | 0.059  | 0.99172-<br>1.00024 | 0.99598 |
|   | GTV volume       | 0.002  | 1.0053-<br>1.02362  | 1.01446 |
| 3 | GTV mean dose    | 0.042  | 0.99276-<br>0.99996 | 0.99630 |
|   | GTV volume       | 0.0005 | 1.00686-<br>1.02478 | 1.01582 |
| 4 | GTV maximum dose | 0.04   | 0.99343-<br>0.99991 | 0.99667 |
|   | GTV volume       | 0.0003 | 1.00734-<br>1.02522 | 1.01628 |

Rx: prescription; GTV: gross tumor volume (in mL).

Table S2 Prescription dose and GTV volume model

| values | index.orig   | training     | test        | optimism     | index.corrected | n    |
|--------|--------------|--------------|-------------|--------------|-----------------|------|
| Dxy    | 0.244937073  | 0.243806916  | 0.234935284 | 0.008871632  | 0.236065441     | 1000 |
| R2     | 0.036866192  | 0.042419252  | 0.033556826 | 0.008862426  | 0.028003767     | 1000 |
| Slope  | 1.000000000  | 1.000000000  | 0.958265124 | 0.041734876  | 0.958265124     | 1000 |
| D      | 0.012242654  | 0.014324331  | 0.011033412 | 0.003290919  | 0.008951736     | 1000 |
| U      | -0.002107209 | -0.002124432 | 0.002471792 | -0.004596224 | 0.002489014     | 1000 |
| Q      | 0.014349864  | 0.016448763  | 0.008561620 | 0.007887142  | 0.006462721     | 1000 |

Somers' Dxy is equal to 2\* (C-index -0.5), and C-index is the concordance probability. R<sup>2</sup> is goodness of fit. D is discrimination telling the difference in quality of the best constant predictor and the best calibrated predictor. U is unreliability of the predictions, Q is overall summary showing the difference in quality between the best constant predictor and the quality of the predictions when no calibration was made. The c-index value is 0.618.
